# Supplementary material
Source: PubMed Central journal article supplement (PMC4322067)
Supplement: 13311_2014_304_MOESM3_ESM.pdf [file 13311_2014_304_MOESM3_ESM.pdf]

## Supplementary Figure 1

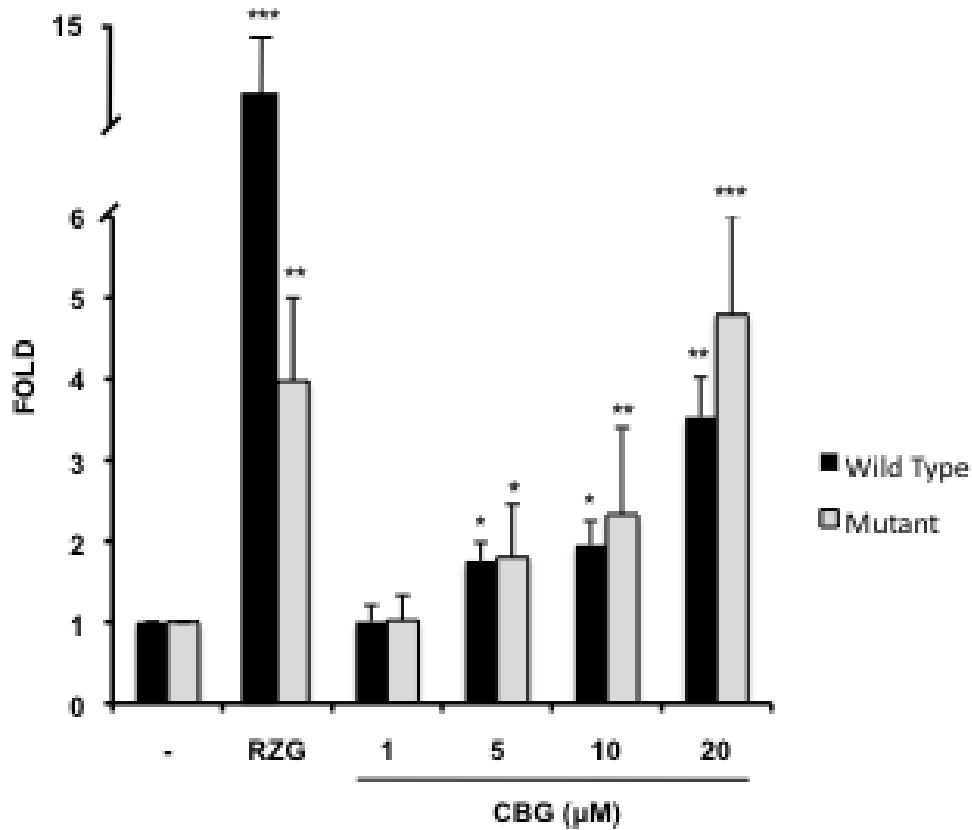

**Effect of CBG on PPAR $\gamma$  transcriptional activity.** STHdh<sup>Q7/Q7</sup> (wild-type) and STHdh<sup>Q111/Q111</sup> (mutant) cells were co-transfected with GAL4-PPAR $\gamma$  and GAL4-luc. Cells were treated with of CBG at the indicated concentrations for 12 h and luciferase activity measured in the cell lysates. Fold activation level was calculated, taking the control sample as reference. Data are expressed as mean  $\pm$  S.D. of at least three independent experiments. \* $p < 0.05$ , \*\* $p < 0.01$  and \*\*\* $p < 0.005$  in an unpaired two-tailed Student's *t* test.

**Table 1S.** HD array analysis (84 genes) showing their up- or down-regulatory responses in the striatum of control and 3NP-lesioned mice treated with CBG or vehicle. Values correspond to number of folds that a specific gene is up- (positive value) or down-regulated (negative value).

**3NP vs control**

**3NP+CBG vs control**

| Gene   | Fold Up- or Down-Regulation | Gene     | Fold Up- or Down-Regulation |
|--------|-----------------------------|----------|-----------------------------|
| Akt1   | -1,0396                     | Kcnc3    | 1,0098                      |
| Apoe   | -1,4804                     | Lpl      | 1,0454                      |
| Aqp1   | 1,0898                      | Map3k10  | -1,0989                     |
| Arfp2  | 1,2008                      | Ncor1    | 1,1204                      |
| Atp2b2 | -1,2025                     | Nefl     | -1,5326                     |
| Bax    | -1,0253                     | Ngef     | -1,0468                     |
| Bbox1  | -1,0762                     | Ntrk2    | 1,2431                      |
| Bdnf   | 1,5845                      | Pacsin1  | -1,0324                     |
| C3     | 1,1761                      | Pgk1     | 1,0454                      |
| Calb1  | -1,1376                     | Plcb4    | 1,0238                      |
| Casp3  | 1,1925                      | Plod2    | -1,0837                     |
| Casp8  | 1,3890                      | Ppargc1a | 1,3794                      |
| Cd44   | <b>3,0189</b>               | Ppp3ca   | -1,0253                     |
| Cltc   | 1,1519                      | Prkcb    | 1,1050                      |
| Cnr1   | -1,0042                     | Prpf40a  | 1,2518                      |
| Creb1  | -1,1615                     | Ptpn11   | 1,4083                      |
| Crebbp | 1,1680                      | Rab6     | 1,0673                      |
| Dctn1  | 1,1127                      | Rcor1    | 1,0168                      |
| Dlg4   | -1,2449                     | Rest     | 1,5845                      |
| Eef1a2 | -1,0112                     | Rgs4     | -1,2449                     |
| Egfr   | -1,2277                     | Rilp     | 1,9106                      |
| Elmo1  | 1,2781                      | Rph3a    | -1,3717                     |
| Fgf12  | 1,2260                      | Rxrb     | -1,0042                     |
| Gabrd  | -1,1696                     | Sgk1     | 2,7207                      |
| Gja1   | -1,6088                     | Sin3a    | 1,0028                      |
| Gjb6   | 1,2260                      | Slc14a1  | 1,8583                      |
| Gnaq   | 1,0526                      | Slc25a4  | 1,0822                      |
| Gpx1   | 1,2092                      | Snap25   | 1,0168                      |
| Grb2   | 1,1599                      | Sod1     | 1,1127                      |
| Grin2a | 1,3794                      | Sox2     | -1,1142                     |
| Grin2b | 1,2431                      | Sp1      | -1,1535                     |
| Grm5   | -1,0614                     | Sympk    | -1,0989                     |
| Hap1   | 1,0098                      | Syn1     | 1,0098                      |
| Hdac1  | 1,2176                      | Tac1     | 1,1439                      |
| Hdac2  | -1,1142                     | Tbp      | 1,1761                      |
| Hip1   | 1,1599                      | Tgm2     | 2,0907                      |
| Homer1 | -1,1455                     | Tollip   | 1,3324                      |
| Hpca   | 1,1127                      | Trp53    | 1,1599                      |
| Htt    | 1,1050                      | Tubb5    | -1,1297                     |
| Ift57  | 1,0526                      | Zbtb16   | 1,6178                      |
| Igf1   | 1,3416                      | Actb     | 1,1439                      |
| Itpr1  | -1,0541                     | B2m      | 1,0310                      |
| Kcnab1 | -1,1142                     | Gapdh    | -1,1065                     |
| Kcnab2 | 1,0238                      | Gusb     | -1,0253                     |
|        |                             | Hsp90ab1 | -1,0396                     |

| Gene   | Fold Up- or Down-Regulation | Gene     | Fold Up- or Down-Regulation |
|--------|-----------------------------|----------|-----------------------------|
| Akt1   | -1,1810                     | Kcnc3    | 1,0943                      |
| Apoe   | -1,1892                     | Lpl      | -1,0140                     |
| Aqp1   | 1,1096                      | Map3k10  | 1,0210                      |
| Arfp2  | -1,0570                     | Ncor1    | 1,0718                      |
| Atp2b2 | -1,0792                     | Nefl     | -1,2142                     |
| Bax    | -1,0425                     | Ngef     | -1,1096                     |
| Bbox1  | -1,1647                     | Ntrk2    | 1,0570                      |
| Bdnf   | 1,0644                      | Pacsin1  | -1,0425                     |
| C3     | 1,0792                      | Pgk1     | -1,1408                     |
| Calb1  | -1,2226                     | Plcb4    | 1,1408                      |
| Casp3  | -1,3195                     | Plod2    | -1,1647                     |
| Casp8  | 1,3566                      | Ppargc1a | 1,1728                      |
| Cd44   | -1,3104                     | Ppp3ca   | 1,0353                      |
| Cltc   | -1,1096                     | Prkcb    | 1,0644                      |
| Cnr1   | -1,1173                     | Prpf40a  | 1,0281                      |
| Creb1  | 1,1567                      | Ptpn11   | 1,0792                      |
| Crebbp | 1,0570                      | Rab6     | 1,1647                      |
| Dctn1  | 1,1487                      | Rcor1    | -1,0281                     |
| Dlg4   | -1,1408                     | Rest     | 1,0210                      |
| Eef1a2 | 1,0070                      | Rgs4     | -1,1647                     |
| Egfr   | -1,1647                     | Rilp     | -1,0570                     |
| Elmo1  | 1,1810                      | Rph3a    | -1,0792                     |
| Fgf12  | 1,0353                      | Rxrb     | 1,1567                      |
| Gabrd  | -1,0570                     | Sgk1     | -1,4142                     |
| Gja1   | -1,0353                     | Sin3a    | 1,1019                      |
| Gjb6   | 1,1567                      | Slc14a1  | 1,2311                      |
| Gnaq   | -1,0353                     | Slc25a4  | -1,1096                     |
| Gpx1   | 1,2746                      | Snap25   | -1,0140                     |
| Grb2   | 1,0353                      | Sod1     | 1,0210                      |
| Grin2a | 1,1892                      | Sox2     | -1,1019                     |
| Grin2b | 1,2058                      | Sp1      | -1,0867                     |
| Grm5   | 1,0070                      | Sympk    | 1,0425                      |
| Hap1   | -1,0497                     | Syn1     | 1,0570                      |
| Hdac1  | 1,0353                      | Tac1     | 1,3472                      |
| Hdac2  | -1,1567                     | Tbp      | 1,1975                      |
| Hip1   | 1,1408                      | Tgm2     | 1,5911                      |
| Homer1 | 1,0281                      | Tollip   | 1,0718                      |
| Hpca   | 1,0210                      | Trp53    | 1,3851                      |
| Htt    | -1,0000                     | Tubb5    | -1,0718                     |
| Ift57  | 1,1329                      | Zbtb16   | 1,0943                      |
| Igf1   | 1,1251                      | Actb     | -1,0644                     |
| Itpr1  | 1,1892                      | B2m      | 1,1728                      |
| Kcnab1 | -1,1647                     | Gapdh    | -1,2483                     |
| Kcnab2 | 1,0353                      | Gusb     | 1,0867                      |
|        |                             | Hsp90ab1 | 1,0425                      |

**Table 2S.** HD array analysis (84 genes) showing their up- or down-regulatory responses in the striatum of wild-type and R6/2 mice treated with CBG or vehicle. Values correspond to number of folds that a specific gene is up- (positive value) or down-regulated (negative value).

**R6/2 vs wild-type**

**R6/2+CBG vs wild-type**

| Gene   | Fold Up- or Down-Regulation | Gene     | Fold Up- or Down-Regulation |
|--------|-----------------------------|----------|-----------------------------|
| Akt1   | 1,0733                      | Kcnc3    | -1,1313                     |
| ApoE   | -2,3424                     | Lpl      | -1,4722                     |
| Aqp1   | -1,4025                     | Map3k10  | 1,0807                      |
| Arfp2  | -1,0629                     | Ncor1    | 1,3967                      |
| Atp2b2 | -2,5633                     | Nefl     | 1,4459                      |
| Bax    | 1,1503                      | Ngef     | -1,8251                     |
| Bbox1  | 2,5883                      | Ntrk2    | 1,0958                      |
| Bdnf   | -1,2209                     | Pacsin1  | -1,6795                     |
| C3     | -2,6537                     | Pgk1     | 1,1423                      |
| Calb1  | 1,4969                      | Plcb4    | -1,5562                     |
| Casp3  | 1,3491                      | Plod2    | 1,7435                      |
| Casp8  | 1,3398                      | Ppargc1a | 1,0014                      |
| Cd44   | <b>-3,3589</b>              | Ppp3ca   | <b>-3,0063</b>              |
| Cltc   | 1,0084                      | Prkcb    | -1,1631                     |
| Cnr1   | <b>-3,9945</b>              | Prpf40a  | 1,3491                      |
| Creb1  | 1,1345                      | Ptpn11   | 1,1663                      |
| Crebbp | 1,6609                      | Rab6     | 1,3122                      |
| Dctn1  | -1,8125                     | Rcor1    | 2,8521                      |
| Dlg4   | -2,4083                     | Rest     | -1,4221                     |
| Eef1a2 | -1,8895                     | Rgs4     | <b>-3,2898</b>              |
| Egfr   | 1,3122                      | Rilp     | -1,2816                     |
| Elmo1  | -1,0852                     | Rph3a    | -1,5347                     |
| Fgf12  | -1,1157                     | Rxb1     | <b>-3,8053</b>              |
| Gabrd  | <b>-7,0031</b>              | Sgk1     | -1,5889                     |
| Gja1   | <b>-3,3823</b>              | Sin3a    | -2,3751                     |
| Gjb6   | -1,2041                     | Slc14a1  | -1,3268                     |
| Gnaq   | 1,6044                      | Slc25a4  | 1,5497                      |
| Gpx1   | 1,5178                      | Snap25   | -1,0777                     |
| Grb2   | 1,8050                      | Sod1     | 1,9480                      |
| Grin2a | -1,1958                     | Sox2     | -1,1080                     |
| Grin2b | -2,1555                     | Sp1      | 1,6609                      |
| Grm5   | 1,0367                      | Sympk    | <b>-5,4945</b>              |
| Hap1   | 2,2847                      | Syn1     | 1,0882                      |
| Hdac1  | 1,7195                      | Tac1     | 1,2159                      |
| Hdac2  | 2,2532                      | Tbp      | 1,5284                      |
| Hip1   | -1,0338                     | Tgm2     | 1,6609                      |
| Homer1 | -1,9026                     | Tollip   | 1,4459                      |
| Hpca   | <b>-3,0908</b>              | Trp53    | 1,2159                      |
| Htt    | -1,6223                     | Tubb5    | -1,1004                     |
| Ift57  | 1,0733                      | Zbtb16   | -1,4722                     |
| Igf1   | -1,8506                     | Actb     | -1,9697                     |
| Itpr1  | -2,7856                     | B2m      | 1,5497                      |
| Kcnab1 | -1,5670                     | Gapdh    | 1,0367                      |
| Kcnab2 | 1,1503                      | Gusb     | 1,1583                      |
|        |                             | Hsp90ab1 | 1,0585                      |

| Gene   | Fold Up- or Down-Regulation | Gene     | Fold Up- or Down-Regulation |
|--------|-----------------------------|----------|-----------------------------|
| Akt1   | -1,0483                     | Kcnc3    | -1,1313                     |
| ApoE   | -2,5105                     | Lpl      | -2,9856                     |
| Aqp1   | -1,5999                     | Map3k10  | -1,0852                     |
| Arfp2  | 1,0439                      | Ncor1    | 1,0154                      |
| Atp2b2 | -3,0063                     | Nefl     | 1,2414                      |
| Bax    | -1,0556                     | Ngef     | -2,1856                     |
| Bbox1  | -1,2995                     | Ntrk2    | -1,1958                     |
| Bdnf   | 1,2414                      | Pacsin1  | -1,4025                     |
| C3     | -3,7529                     | Pgk1     | 1,0295                      |
| Calb1  | -1,5562                     | Plcb4    | -1,3268                     |
| Casp3  | 1,2675                      | Plod2    | -1,1712                     |
| Casp8  | -1,4722                     | Ppargc1a | -1,2041                     |
| Cd44   | -1,2728                     | Ppp3ca   | -2,5456                     |
| Cltc   | -1,1080                     | Prkcb    | -2,0820                     |
| Cnr1   | -4,0784                     | Prpf40a  | 1,2243                      |
| Creb1  | -1,1392                     | Ptpn11   | -1,1712                     |
| Crebbp | 1,0585                      | Rab6     | 1,3305                      |
| Dctn1  | -1,7630                     | Rcor1    | 1,2329                      |
| Dlg4   | -2,4419                     | Rest     | -2,0392                     |
| Eef1a2 | -1,6223                     | Rgs4     | -3,2898                     |
| Egfr   | -1,2294                     | Rilp     | -1,4928                     |
| Elmo1  | -1,8000                     | Rph3a    | -1,4520                     |
| Fgf12  | -1,1157                     | Rxb1     | -1,8506                     |
| Gabrd  | -4,3409                     | Sgk1     | -1,4722                     |
| Gja1   | -3,3357                     | Sin3a    | -1,8125                     |
| Gjb6   | -1,1794                     | Slc14a1  | -1,7876                     |
| Gnaq   | 1,1266                      | Slc25a4  | 1,3775                      |
| Gpx1   | 1,0439                      | Snap25   | 1,0733                      |
| Grb2   | 1,2414                      | Sod1     | 1,1034                      |
| Grin2a | -1,3454                     | Sox2     | -1,2816                     |
| Grin2b | -1,8895                     | Sp1      | 1,0439                      |
| Grm5   | -1,8251                     | Sympk    | -3,3823                     |
| Hap1   | -1,0556                     | Syn1     | 1,0882                      |
| Hdac1  | 1,2763                      | Tac1     | -1,3177                     |
| Hdac2  | 1,2852                      | Tbp      | 1,1423                      |
| Hip1   | -1,8378                     | Tgm2     | 1,2763                      |
| Homer1 | -2,2315                     | Tollip   | 1,1663                      |
| Hpca   | -4,1068                     | Trp53    | 1,1423                      |
| Htt    | -1,9159                     | Tubb5    | -1,0703                     |
| Ift57  | -1,1471                     | Zbtb16   | 1,2588                      |
| Igf1   | -1,2294                     | Actb     | -1,5889                     |
| Itpr1  | -2,1705                     | B2m      | 1,2329                      |
| Kcnab1 | -2,5991                     | Gapdh    | 1,1111                      |
| Kcnab2 | -1,1004                     | Gusb     | 1,1991                      |
|        |                             | Hsp90ab1 | -1,0338                     |
